# Supplementary material for: Giant cell arteritis with cervical radiculopathy mimicking polymyalgia rheumatica and elderly-onset rheumatoid arthritis: a case report
Source: Springer Nature journal article supplement (doi:10.1186/s13256-021-03107-7), 2021-10-19

## Flow Diagram — Case Reports following the CARE guidelines

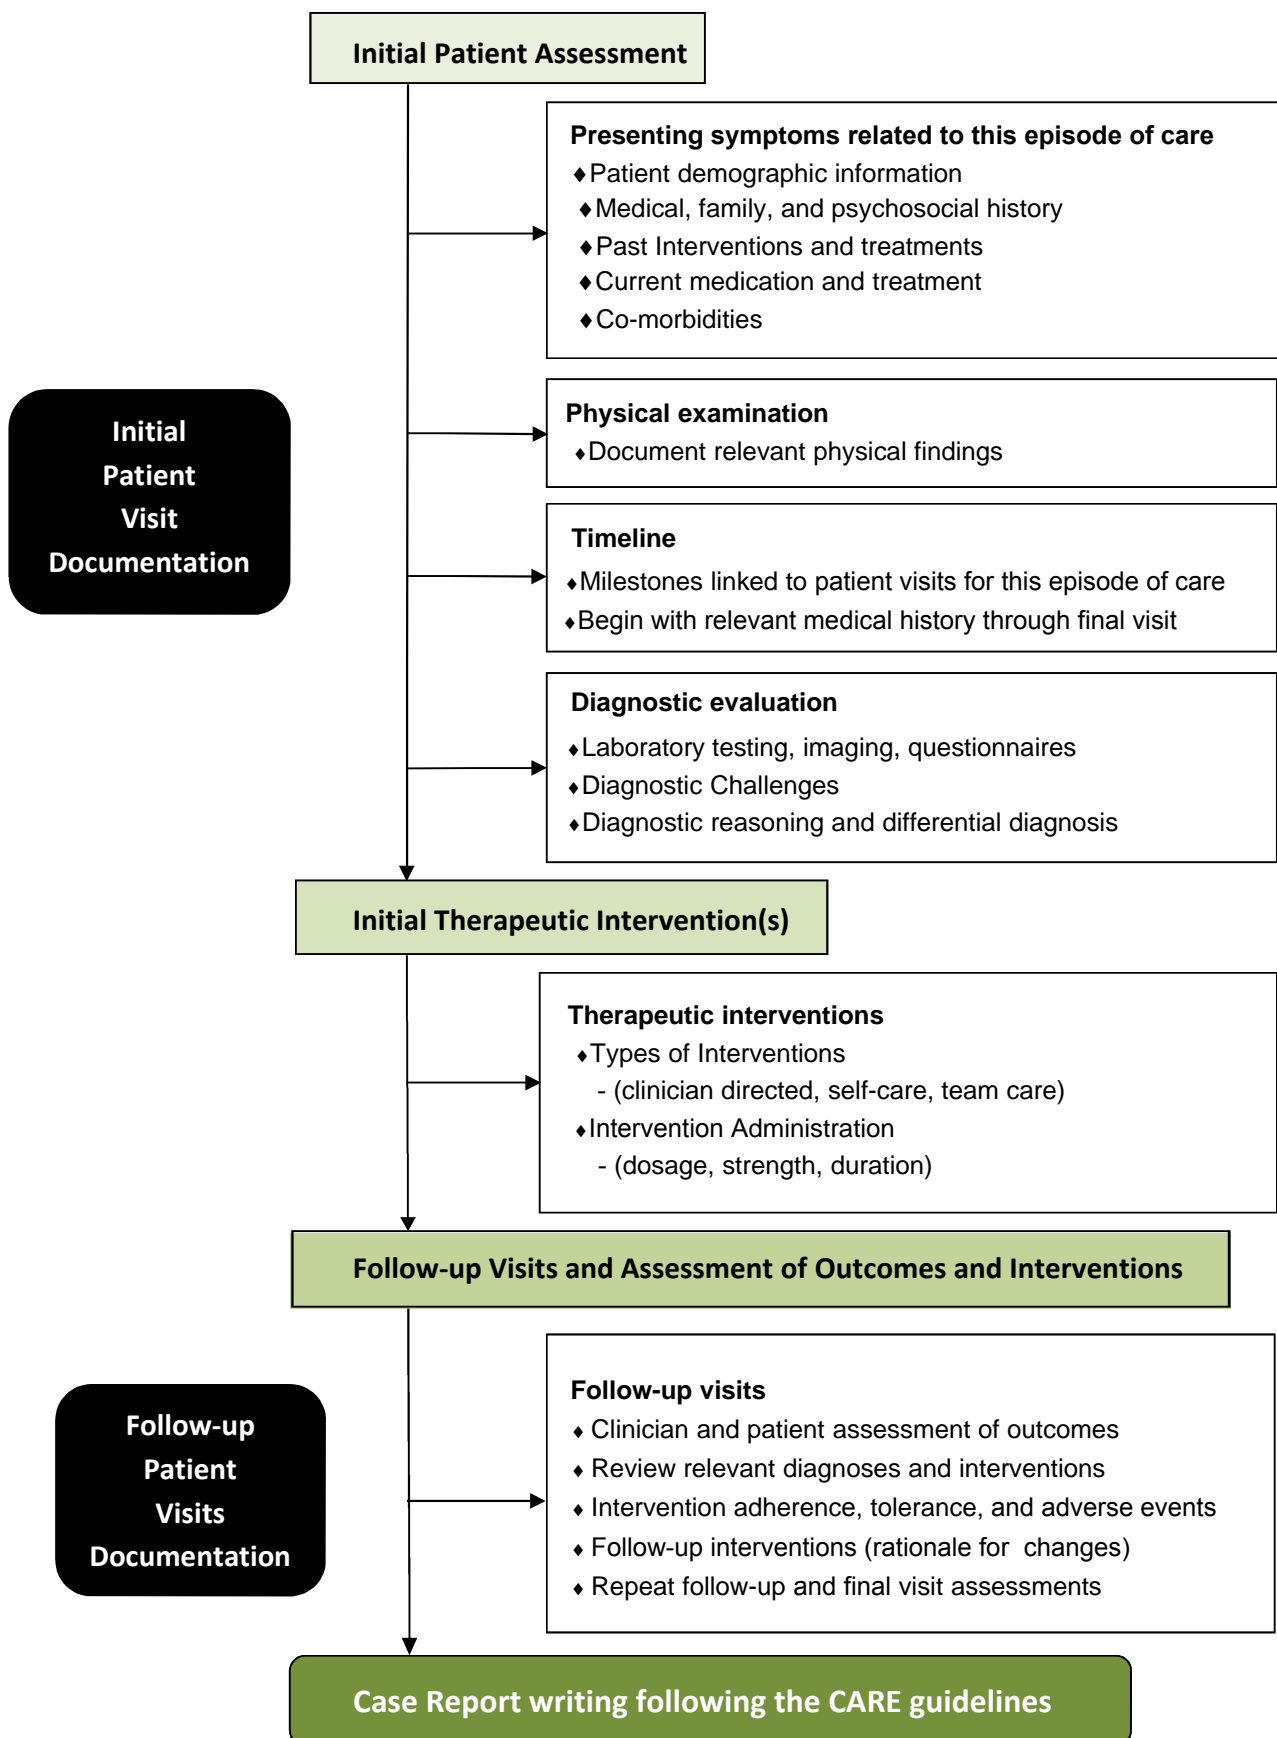

Supplement: MOESM1 [file 19772770]
